# Supplementary material for: Biomimetic redox-responsive smart coatings with resistance-release functions for reverse osmosis membranes
Source: Royal Society of Chemistry journal article supplement (doi:10.1039/d3tb00904a), 2023-01-01
Supplement: d3tb00904a1.pdf [file d3tb00904a1.pdf]

## 1 **Supplementary Material**

### 2 **Biomimetic redox-responsive smart coatings with resistance-** 3 **release functions for reverse osmosis membranes**

4 *Ya-Ge Wu*<sup>1</sup>, *Xin-Zheng Li*<sup>2</sup>, *Jing Zhao*<sup>3</sup>, *Xu Yang*<sup>3</sup>, *Ya-Juan Cai*<sup>4</sup>, *Han Jiang*<sup>2</sup>, *Yi-Xing*  
5 *Sun*<sup>1</sup>, *Nan-Jun Wei*<sup>1</sup>, *Yang Liu*<sup>1</sup>, *Yi-Bo Li*<sup>1</sup>, *Zi-Hao Yang*<sup>1</sup>, *Meng-Ying Jiang*<sup>1,\*</sup>, *Jing-*  
6 *Gang Gai*<sup>1,\*</sup>

7

8 <sup>1</sup>State Key Laboratory of Polymer Materials Engineering, Polymer Research Institute  
9 of Sichuan University, Chengdu, Sichuan 610065, China

10 <sup>2</sup>Nuclear Power Institute of China, 328, Section 1, Changshun Avenue, Huayang,  
11 Shuangliu District, Chengdu City, Sichuan Province, 610200, China

12 <sup>3</sup>PetroChina Liaoyang Petrochemical Company, No. 7 Torch Street, Hongwei District,  
13 Liaoyang, Liaoning 111000, China

14 <sup>4</sup>Sichuan Guojian Inspection Co., Ltd, No. 17, Section 1, Kangcheng Road, Jiangyang  
15 District, Luzhou 646099, Sichuan, China

16

17 \*Corresponding author, E-mail: [gaijinggang202309@163.com](mailto:gaijinggang202309@163.com) (J-G. Gai);  
18 [mengying202309@163.com](mailto:mengying202309@163.com) (M-Y Jiang)

19

20

21

22

23

24

25

26

27

28

29

30

### 31 Effect of CA on the DA self-polymerization

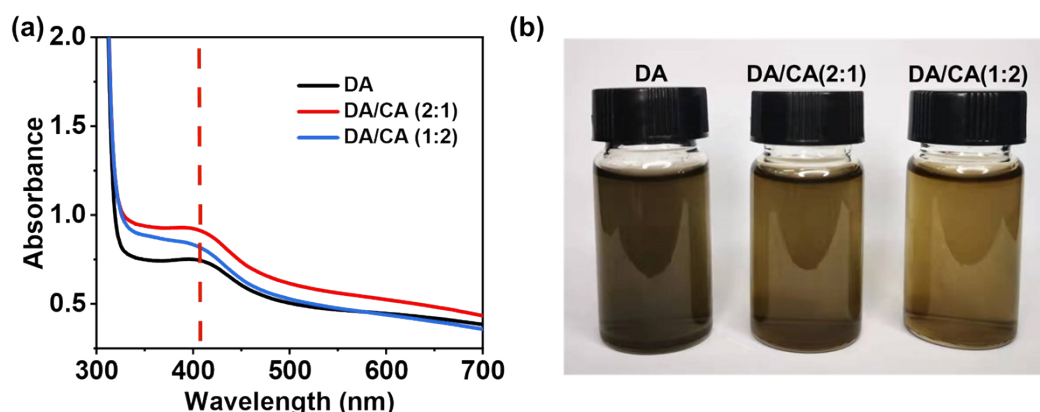

32

33 **Figure S1.** (a) UV-vis spectra of DA solution and DA/CA solutions after 4 h oxidation. (b) Optical

34 images of the solutions after 4 h.

35 An ultraviolet spectrophotometer conducts the effect of CA on DA self-polymerization.

36 Figure S1a shows a broad absorbance peak at 406 nm arises after 4 h reaction, which is

37 assigned to an  $n-\pi^*$  transition of the carbonyl group in DA quinone.<sup>1</sup> Adding CA leads

38 to a decreased absorbance peak compared with the pure DA solution. This is ascribed

39 to the Michael-addition or Schiff-base reaction between oxidized DA and the amine

40 groups of CA, suppressing the aggregation of PDA.<sup>1, 2</sup> Besides, the colours of the DA

41 solution can reflect the degree of DA self-polymerization.<sup>3</sup> As shown in Figure S1b, the

42 colour of the DA solution gradually becomes shallower with the increase of CA

43 concentration. The covalent bonds between DA and CA weaken the intermolecular

44 coupling effect of DA and hinder the formation of large DA aggregates, which makes

45 the DA/CA solution more clarified than the DA solution.

46 **Table S1.** Element content of the TFC-PA and PDA/CA coated membranes.

| Samples  | C (%) | N (%) | O (%) | S (%) | N/O  |
|----------|-------|-------|-------|-------|------|
| TFC-PA   | 79.33 | 9.84  | 10.83 | /     | 0.91 |
| PDA/CA-1 | 76.54 | 10.30 | 11.50 | 1.66  | 0.90 |
| PDA/CA-2 | 75.95 | 11.34 | 10.78 | 1.92  | 1.05 |

|                 |       |       |       |      |      |
|-----------------|-------|-------|-------|------|------|
| <b>PDA/CA-3</b> | 75.79 | 10.70 | 10.88 | 2.63 | 0.98 |
|-----------------|-------|-------|-------|------|------|

47 **Table S2.** Surface roughness of the TFC-PA and PDA/CA coated membranes.

| Membrane                  | TFC-PA | PDA/CA-1 | PDA/CA-2 | PDA/CA-3 |
|---------------------------|--------|----------|----------|----------|
| <b>R<sub>a</sub> (nm)</b> | 35.1   | 43.3     | 37.8     | 40.2     |
| <b>R<sub>q</sub> (nm)</b> | 44.6   | 54.3     | 47.7     | 51.8     |

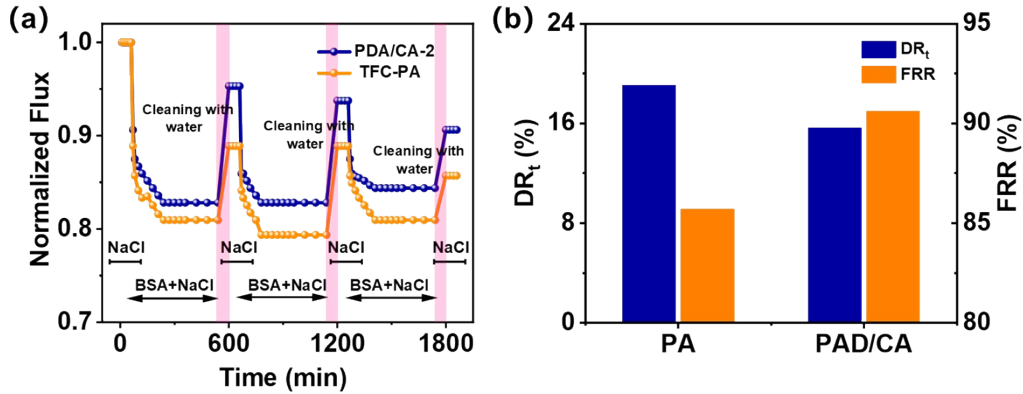

48

49 **Figure S2.** Normalized water flux (a) and corresponding flux recovery rate and loss rate (b) of TFC-  
50 PA and PDA/CA-2 against BSA at 25 °C, 1.6 MPa.

51 **Table S3.** Summary of the separation performance of PDA/CA-2 and other reported membranes.

| Name                                        | Water Flux (L m <sup>-2</sup> h <sup>-1</sup> ) | Salt Rejection (%) |    |
|---------------------------------------------|-------------------------------------------------|--------------------|----|
| <b>TFCMZs</b>                               | 54.5                                            | 98.90              | 4  |
| <b>l-cysteine-TFC</b>                       | 49                                              | 98.40              | 5  |
| <b>TFC-TOB<sub>2</sub>/APD<sub>10</sub></b> | 42.7                                            | 98.00              | 6  |
| <b>H + T-modified</b>                       | 54.1                                            | 99.05              | 7  |
| <b>GHPEI-PA</b>                             | 37.0                                            | 98.20              | 8  |
| <b>MWCNT-AA</b>                             | 25                                              | 96.90              | 9  |
| <b>TFC PAMAM2</b>                           | 42.5                                            | 98.00              | 10 |
| <b>PAA/TOB</b>                              | 47.7                                            | 99.50              | 11 |
| <b>MpMPD-PA</b>                             | 24.5                                            | 97.80              | 12 |
| <b>PA-SPVA</b>                              | 42.6                                            | 99.28              | 13 |
| <b>BW30</b>                                 | 49                                              | 98.50              | 14 |
| <b>Arg-5</b>                                | 63                                              | 98.10              | 15 |
| <b>PA-SMPTES</b>                            | 47.8                                            | 99.29              | 16 |
| <b>This work</b>                            | 65                                              | 99.11              |    |

52

53 **Reference:**

54 1. Yang, S. J.; Zou, L. Y.; Liu, C.; Zhong, Q.; Ma, Z. Y.; Yang, J.; Ji, J.; Muller-Buschbaum, P.;

55 Xu, Z. K., Codeposition of Levodopa and Polyethyleneimine: Reaction Mechanism and Coating  
56 Construction. *ACS Appl Mater Interfaces* **2020**.

57 2. Yang, H.-C.; Wu, M.-B.; Li, Y.-J.; Chen, Y.-F.; Wan, L.-S.; Xu, Z.-K., Effects of  
58 polyethyleneimine molecular weight and proportion on the membrane hydrophilization by codepositing  
59 with dopamine. *J Appl Polym Sci* **2016**, *133* (32).

60 3. Ryu, J. H.; Messersmith, P. B.; Lee, H., Polydopamine Surface Chemistry: A Decade of Discovery.  
61 *ACS Appl Mater Interfaces* **2018**, *10* (9), 7523-7540.

62 4. Ma, R.; Ji, Y.-L.; Weng, X.-D.; An, Q.-F.; Gao, C.-J., High-flux and fouling-resistant reverse  
63 osmosis membrane prepared with incorporating zwitterionic amine monomers via interfacial  
64 polymerization. *Desalination* **2016**, *381*, 100-110.

65 5. Azari, S.; Zou, L., Fouling resistant zwitterionic surface modification of reverse osmosis  
66 membranes using amino acid l-cysteine. *Desalination* **2013**, *324*, 79-86.

67 6. Li, J.; Wang, D.; Wang, Y.; Gao, B.; Wang, Z., Surface Modification of Reverse Osmosis  
68 Membranes for Enhanced Boron Removal and Fouling Resistance. *ACS ES&T Water* **2021**, *1* (10), 2284-  
69 2292.

70 7. Wang, Y.; Wang, Z.; Wang, J.; Wang, S., Triple antifouling strategies for reverse osmosis  
71 membrane biofouling control. *Journal of Membrane Science* **2018**, *549*, 495-506.

72 8. Gao, Y.; Zhao, S.; Qiao, Z.; Zhou, Y.; Song, B.; Wang, Z.; Wang, J., Reverse osmosis membranes  
73 with guanidine and amine enriched surface for biofouling and organic fouling control. *Desalination* **2018**,  
74 *430*, 74-85.

75 9. Vatanpour, V.; Zoqi, N., Surface modification of commercial seawater reverse osmosis membranes  
76 by grafting of hydrophilic monomer blended with carboxylated multiwalled carbon nanotubes. *Appl Surf*  
77 *Sci* **2017**, *396*, 1478-1489.

78 10. Nikolaeva, D.; Langner, C.; Ghanem, A.; Rehim, M. A.; Voit, B.; Meier-Haack, J., Hydrogel  
79 surface modification of reverse osmosis membranes. *Journal of Membrane Science* **2015**, *476*, 264-276.

80 11. Wang, Y.; Wang, Z.; Han, X.; Wang, J.; Wang, S., Improved flux and anti-biofouling  
81 performances of reverse osmosis membrane via surface layer-by-layer assembly. *Journal of Membrane*  
82 *Science* **2017**, *539*, 403-411.

83 12. Li, S.-L.; Wu, P.; Wang, J.; Wang, J.; Hu, Y., Fabrication of high performance polyamide reverse  
84 osmosis membrane from monomer 4-morpholino-m-phenylenediamine and tailoring with zwitterions.  
85 *Desalination* **2020**, *473*, 114169.

86 13. Zhang, Y.; Wan, Y.; Pan, G.; Shi, H.; Yan, H.; Xu, J.; Guo, M.; Wang, Z.; Liu, Y., Surface  
87 modification of polyamide reverse osmosis membrane with sulfonated polyvinyl alcohol for antifouling.  
88 *Appl Surf Sci* **2017**, *419*, 177-187.

89 14. Liu, M.; He, Q.; Guo, Z.; Zhang, K.; Yu, S.; Gao, C., Composite reverse osmosis membrane with  
90 a selective separation layer of double-layer structure for enhanced desalination, anti-fouling and  
91 durability properties. *Desalination* **2021**, *499*, 114838.

92 15. Chen, D.; Liu, T.; Kang, J.; Xu, R.; Cao, Y.; Xiang, M., Enhancing the Permeability and  
93 Antifouling Properties of Polyamide Composite Reverse Osmosis Membrane by Surface Modification  
94 with Zwitterionic Amino Acid l-Arginine. *Adv Mater Interfaces* **2019**, *6* (14), 1900706.

95 16. Zhang, Y.; Wan, Y.; Pan, G.; Yan, H.; Yao, X.; Shi, H.; Tang, Y.; Wei, X.; Liu, Y., Surface  
96 modification of polyamide reverse osmosis membrane with organic-inorganic hybrid material for  
97 antifouling. *Appl Surf Sci* **2018**, *433*, 139-148.

98
